# Supplementary material for: Effect of a butyrate-fortified milk replacer on gastrointestinal microbiota and products of fermentation in artificially reared dairy calves at weaning
Source: PubMed Central journal article supplement (PMC6175921; doi:10.1038/s41598-018-33122-6), 2018-10-08
Supplement: 41598_2018_33122_MOESM2_ESM.pdf [file 41598_2018_33122_MOESM2_ESM.pdf]

Effect of a butyrate-fortified milk replacer on gastrointestinal microbiota and products of fermentation in artificially reared dairy calves at weaning.

O'Hara, E.<sup>1,3</sup>; Kelly, A.<sup>2</sup>; McCabe, M. S.<sup>1</sup>; Kenny, D. A.,<sup>1,2</sup>; Guan, L. L.<sup>3</sup>; Waters, S. M.<sup>1\*</sup>

<sup>1</sup> Teagasc Animal & Bioscience Research Department, Teagasc Grange, Dunsany, Co Meath, Ireland.

<sup>2</sup> UCD School of Agricultural and Food Science, University College Dublin, Belfield, Co. Dublin, Ireland.

<sup>3</sup> Faculty of Agricultural, Food and Nutritional Sciences, University of Alberta, Edmonton, Alberta, Canada.

\*Correspondence to [sinead.waters@teagasc.ie](mailto:sinead.waters@teagasc.ie)

## Supplementary Information

Supplementary Information S1: Nutritional composition and chemical analysis of solid feed offered.

---

| Variable                    | Concentration    |
|-----------------------------|------------------|
| <u>Diet composition</u>     |                  |
| Rolled Barley, %            | 26.5             |
| Soya bean meal, %           | 25               |
| Maize, %                    | 15               |
| Beet pulp, %                | 12.5             |
| Soya hulls, %               | 12.5             |
| Molasses, %                 | 5                |
| Mineral and vitamins, %     | 2.5 <sup>1</sup> |
| Vegetable oil, %            | 1                |
| <u>Chemical composition</u> |                  |
| ADF, g/kg                   | 103.1 (±6.76)    |
| Crude ash, g/kg             | 68.8 (±0.91)     |
| CP, g/kg                    | 167.9 (±1.86)    |
| DM, %                       | 88.9 (±0.66)     |
| NDF, g/kg                   | 204.3 (±18.2)    |
| Oil B <sup>2</sup> , g/kg   | 30.8 (±0.72)     |

---

Supplementary Information S2: Growth rates of calves from birth to weaning

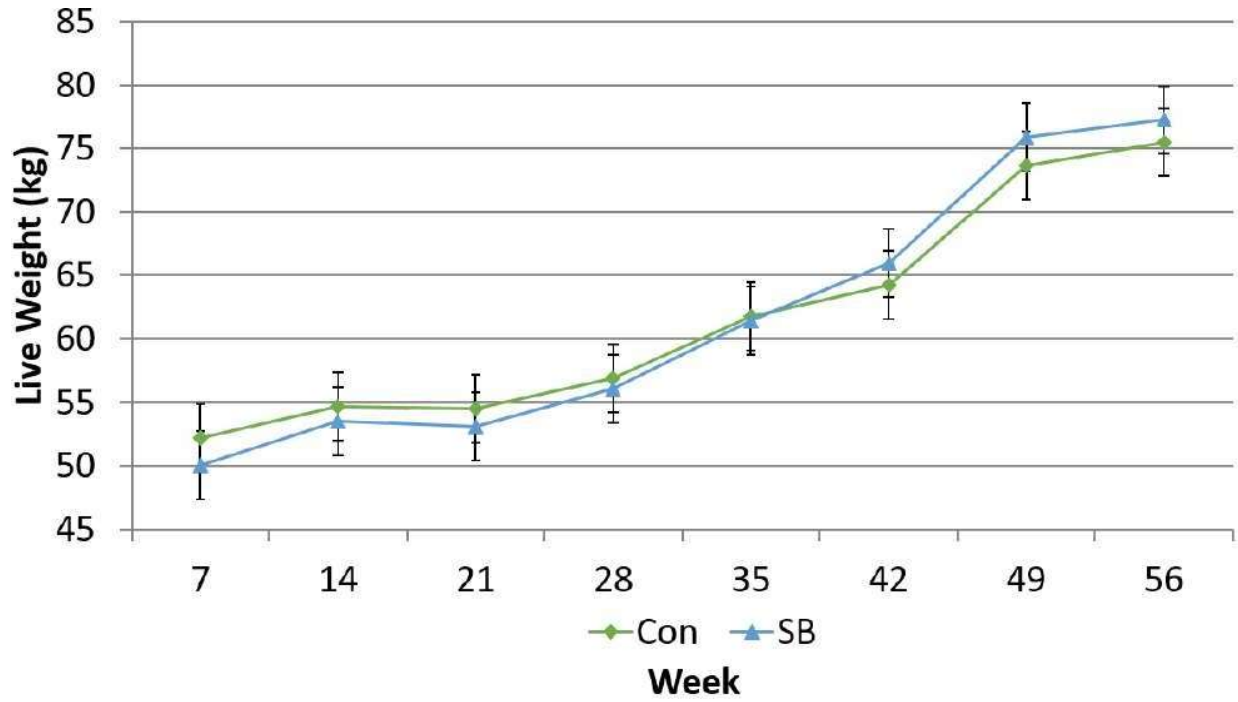

Supplementary Information S3: Solid feed consumption of calves fed MR +/- SB in the preweaning phase

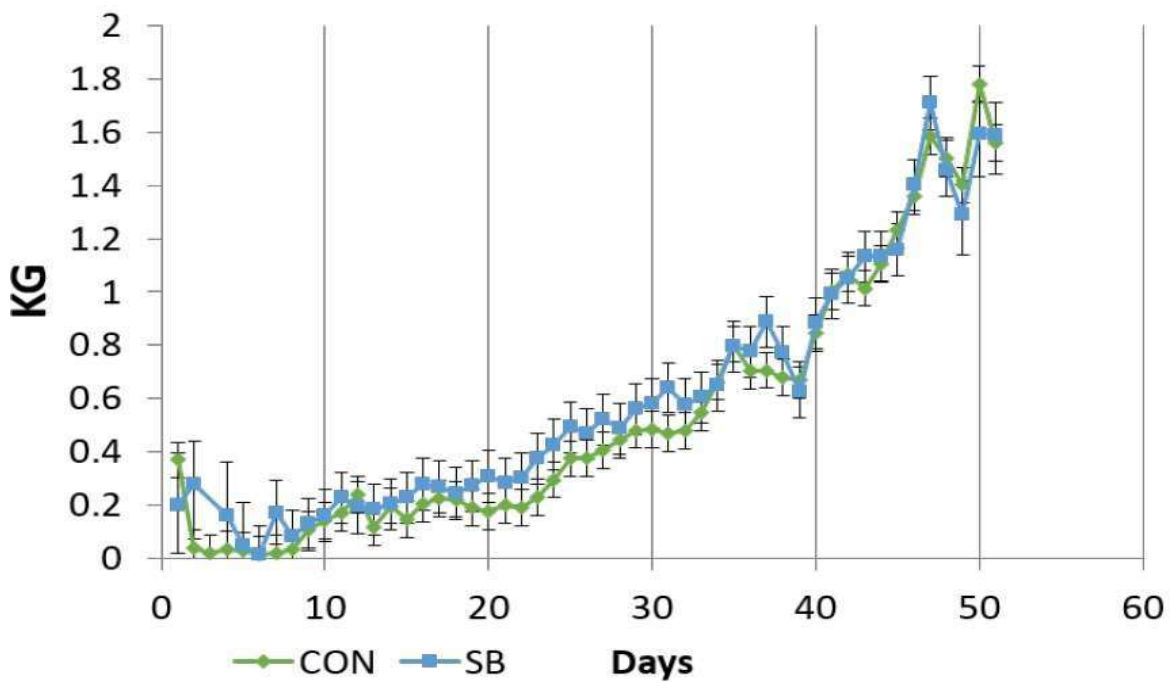

Supplementary Information S4: Milk replacer consumption of calves fed MR +/- SB in the preweaning phase

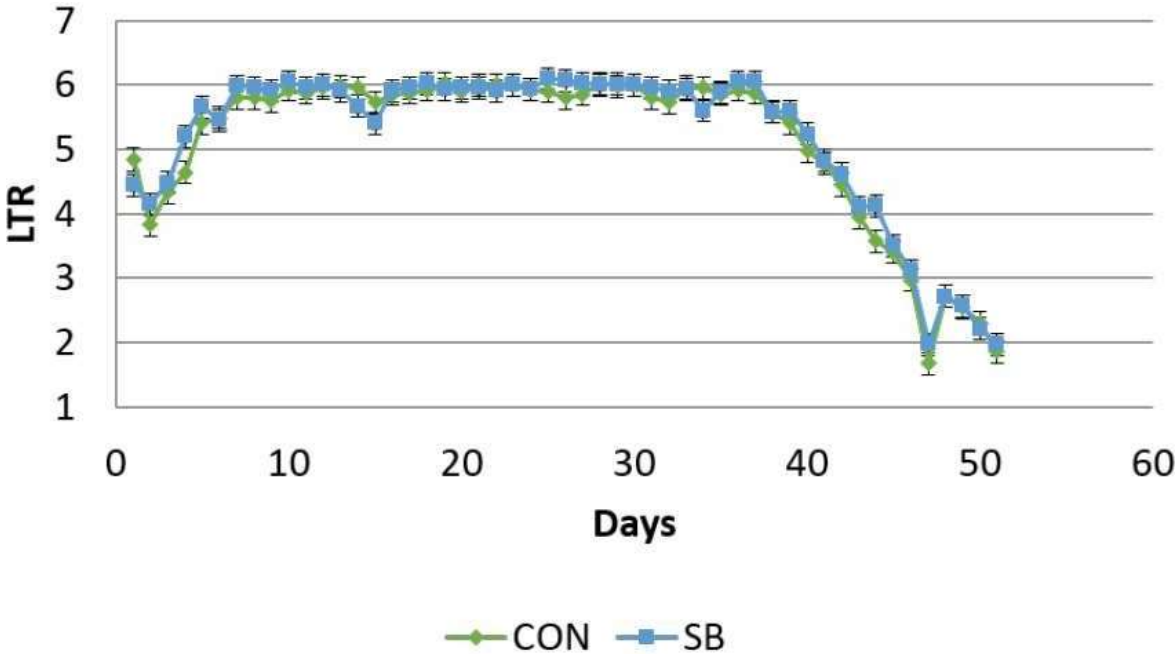

Supplementary Information S5: Details of DNA quantities and quality measurements post-extraction.

| Value         | Rumen |                |                | Cecum |                |                | Colon |                |                |
|---------------|-------|----------------|----------------|-------|----------------|----------------|-------|----------------|----------------|
|               | ng/ul | <u>260/280</u> | <u>260/230</u> | ng/ul | <u>260/280</u> | <u>260/230</u> | ng/ul | <u>260/280</u> | <u>260/230</u> |
| <b>Mean</b>   | 542.4 | 1.8            | 1.9            | 216.2 | 1.9            | 1.8            | 320.0 | 1.9            | 1.8            |
| <b>STDev.</b> | 273.0 | 0.0            | 0.2            | 42.9  | 0.0            | 0.1            | 99.4  | 0.0            | 0.2            |
